# Supplementary material for: Low-cost and highly sensitive colorimetric and visual detection of amikacin in milk using melamine functionalized gold nanoparticles
Source: Royal Society of Chemistry journal article supplement (doi:10.1039/d4ay01342e), 2024-01-01
Supplement: d4ay01342e1.pdf [file d4ay01342e1.pdf]

## Supporting Information

# Low-cost and highly sensitive colorimetric and visual detection of amikacin in milk based on melamine functionalized gold nanoparticles

Sujuan Zhu,<sup>a\*</sup> Ding Zuo,<sup>a</sup> Qiang Shi,<sup>a</sup> Jiexuan Yuan<sup>a</sup> and Bing Wang<sup>b</sup>

<sup>a</sup> College of Bioscience and Biotechnology, Yangzhou University, Yangzhou, Jiangsu 225009, P.R.

China

<sup>b</sup> Center for Disease Control and Prevention, Yangzhou, Jiangsu 225009, P.R. China

**\*Corresponding Author**

E-mail: [sjzhu@yzu.edu.cn](mailto:sjzhu@yzu.edu.cn)

## Smartphone Color Analysis

The photos were taken by the smartphone image acquisition device (SIAD) (Fig. S). The SIAD collected images were then converted into numerical values using the smartphone WeChat applet to obtain color recognition information, in accordance with the methodology described [1].

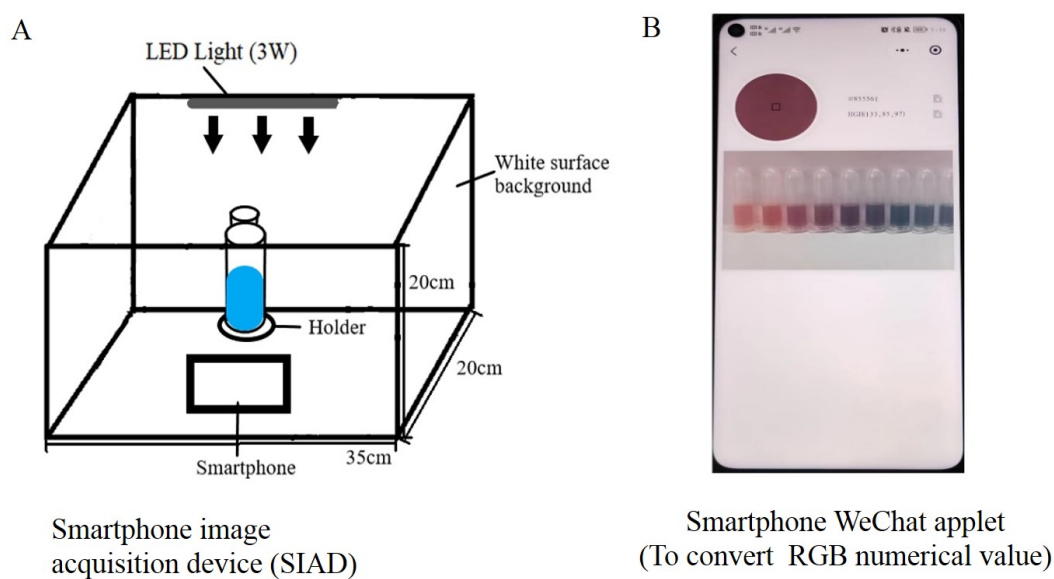

**Fig. S** The basic device of smartphone image acquisition device (SIAD) (A). Convert the captured RGB image into numerical values by smartphone WeChat applet of color recognition extractor (B).

## References

[1] Q. Shi, T. Wang, Y. Zheng, Q. Guo, B. Wang, S.J. Zhu, *Anal. Lett.*, 2023, **56**, 1896-1910.

<https://doi.org/10.1080/00032719.2022.2150202>
